# Supplementary material for: Silicon nitride nanopore created by dielectric breakdown with a divalent cation: deceleration of translocation speed and identification of single nucleotides
Source: Royal Society of Chemistry journal article supplement (doi:10.1039/c9nr03563j), 2019-01-01
Supplement: c9nr03563j1.pdf [file c9nr03563j1.pdf]

## Electronic Supplementary Information

### **Silicon nitride nanopore created by dielectric breakdown with a divalent cation: deceleration of translocation speed and identification of single nucleotides**

Yusuke Goto\*, Kazuma Matsui, Itaru Yanagi and Ken-ichi Takeda

Center for Technology Innovation - Healthcare, Research & Development Group, Hitachi Ltd., 1-280

Higashi-Koigakubo, Kokubunji, Tokyo 185-8601, Japan

**The supplementary information includes the following:**

**SI-1. Device structure for silicon nitride nanopore fabrication**

**SI-2. DNA translocation across a CaCl<sub>2</sub>-CBD nanopore in CaCl<sub>2</sub> solution**

**SI-3. Characteristics of a nanopore created by CBD with a divalent cation**

**SI-4. Slowing effect on other sequences of ssDNA**

**SI-5. Effect of electrolyte concentration at DNA measurement**

**SI-6. Temperature dependence of dwell time for other DNA translocations**

**SI-7. Dependence of the slowing effect on nanopore diameter**

**SI-8. Voltage dependence of dwell time and translocation frequency**

**SI-9. Typical current trace for dNMP measurement**

**SI-10. Estimation of  $h_{eff}$  of 5-nm-thick nanopore fabricated by CBD**

**SI-11. I-V curves of CBD nanopores using various ions**

**SI-12. Ion selectivity measurements of CBD nanopores**

### SI-1. Device structure for silicon nitride nanopore fabrication

A substrate with a silicon nitride (SiN) membrane designed for nanopore fabrication via controlled dielectric breakdown (CBD) is illustrated in Figure S1. A 100-nm-thick  $\text{Si}_3\text{N}_4$  layer, a 150-nm-thick poly-Si layer and a 5-nm-thick  $\text{Si}_3\text{N}_4$  layer were deposited on a Si substrate. A  $500 \times 500 \text{ nm}^2$  square hole was fabricated by dry etching, and the poly-Si layer was partially eliminated by KOH etching. The detailed procedure was described in a previous report.<sup>1</sup>

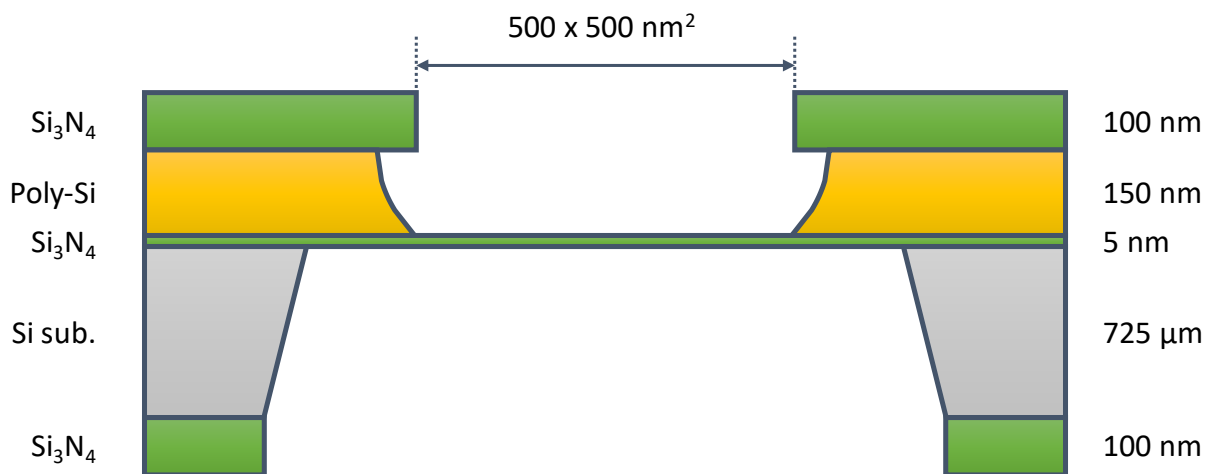

**Figure S1.** Schematic diagram of a substrate with a 5-nm-thick SiN membrane for nanopore fabrication via controlled dielectric breakdown.

## SI-2. DNA translocation across a CaCl<sub>2</sub>-CBD nanopore in CaCl<sub>2</sub> solution

We evaluated poly(dA)<sub>60</sub> translocation across a SiN nanopore created by CBD with 1 M CaCl<sub>2</sub> aqueous solution buffered with 10 mM Tris-HCl in the same CaCl<sub>2</sub> solution. Figure S2a and b show a typical current trace for poly(dA)<sub>60</sub> translocation through the nanopore and a log-scale histogram for dwell time. The most frequent dwell time was 5.1 ms (84 μs/base), which is approximately 80 times slower than the reported value (1 μs/base) for a conventional nanopore.<sup>2-4</sup>

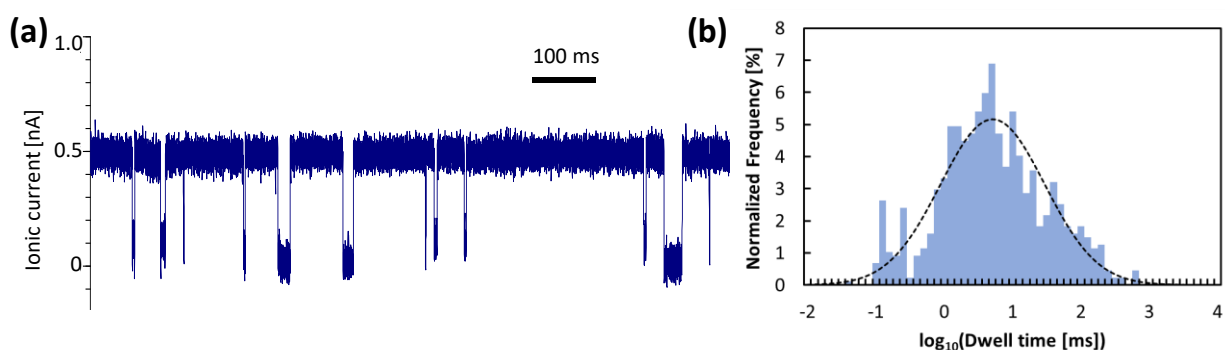

**Figure S2.** (a) Typical current trace for poly(dA)<sub>60</sub> translocation across a SiN nanopore with a diameter of 1.0 nm in 1 M CaCl<sub>2</sub> solution buffered with 10 mM Tris-HCl (pH 7.5) at 0.1 V. The nanopore was fabricated by CBD with the same 1 M CaCl<sub>2</sub>/10 mM Tris-HCl buffer (pH 7.5). The data were measured at room temperature and low-pass filtered at 5 kHz. (b) The log-scaled normalized histogram of dwell time for ssDNA translocation (N=1031).

### SI-3. Characteristics of a nanopore created by CBD with a divalent cation

Figure S3a shows a typical current trace of a SiN nanopore fabricated by CBD with a 1 M aqueous solution of  $\text{CaCl}_2$  as a divalent cation buffered with 10 mM Tris-HCl. The stable current and linear I-V characteristics can be obtained after the exchange of the solution with 4 M CsCl/10 mM Tris-HCl aqueous solution.

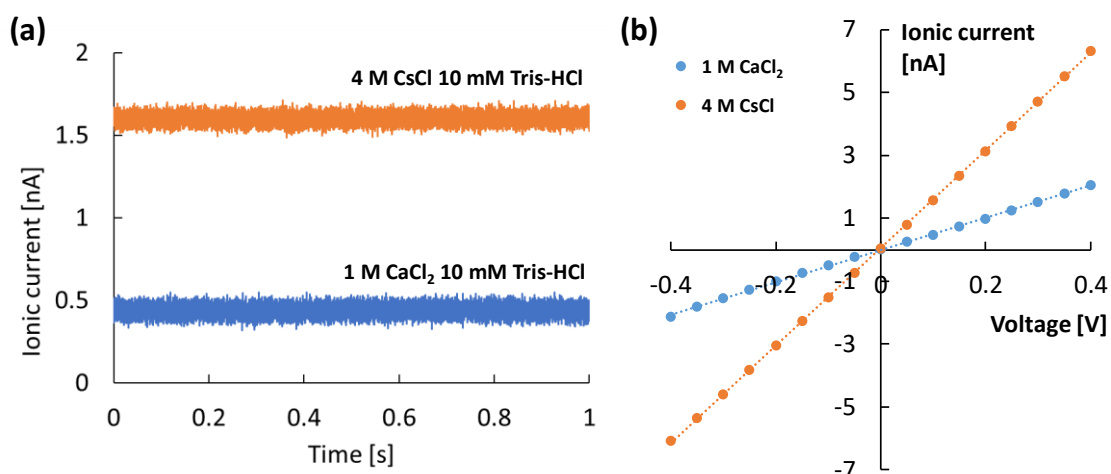

**Figure S3.** (a) Typical current trace of a  $\text{CaCl}_2$ -CBD nanopore at an applied voltage of 0.1 V under 1 M  $\text{CaCl}_2$  solution buffered with 10 mM Tris-HCl at pH 7.5 (blue) or 4 M CsCl solution buffered with 10 mM Tris-HCl at pH 7.5 (orange). (b) I-V characteristics of the nanopore in 1 M  $\text{CaCl}_2$  solution buffered with 10 mM Tris-HCl at pH 7.5 (blue) or 4 M CsCl solution buffered with 10 mM Tris-HCl at pH 7.5 (orange).

#### SI-4. Slowing effect on other sequences of ssDNA

We investigated the slowing effect of the  $\text{CaCl}_2$ -CBD nanopore on DNA translocation for other sequences of single-stranded DNA (ssDNA) using  $\text{poly}(\text{dA})_{60}$  and  $\text{poly}((\text{dG})_1(\text{dA})_1(\text{dC})_1(\text{dT})_1)_{11}$ . Figure S4 presents the normalized log-scaled histogram of dwell time for ssDNAs. These histograms are similarly well fitted by log-normal distributions with peaks at 6.0 ms ( $\text{poly}(\text{dA})_{60}$ ) and 6.1 ms ( $\text{poly}((\text{dG})_1(\text{dA})_1(\text{dC})_1(\text{dT})_1)_{11}$ ). These dwell times correspond to translocation speeds of 100  $\mu\text{s}/\text{base}$  ( $\text{poly}(\text{dA})_{60}$ ) and 140  $\mu\text{s}/\text{base}$  ( $\text{poly}((\text{dG})_1(\text{dA})_1(\text{dC})_1(\text{dT})_1)_{11}$ ). The obtained speeds are almost the same as in the case of 82-nt ssDNA described in the main text. The results indicate that the slowing effect of the  $\text{CaCl}_2$ -CBD nanopore effectively decreases the translocation speed of DNAs with various sequences to 100  $\mu\text{s}/\text{base}$ .

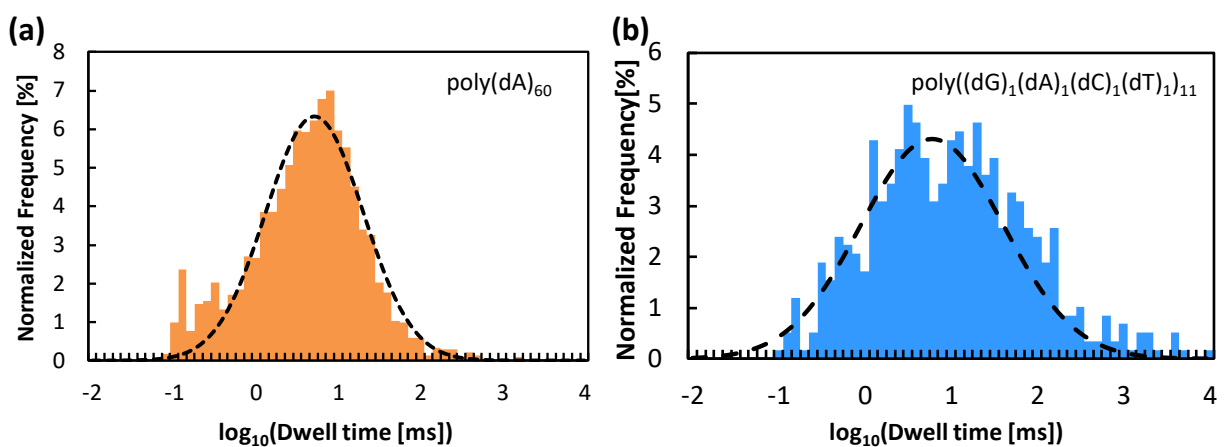

**Figure S4.** The log-scaled histograms of dwell time for ssDNAs with other sequences: (a)  $\text{poly}(\text{dA})_{60}$  (N=2331) and (b)  $\text{poly}((\text{dG})_1(\text{dA})_1(\text{dC})_1(\text{dT})_1)_{11}$  (N=1107), using nanopores fabricated in 1 M  $\text{CaCl}_2$  solution buffered with 10 mM Tris-HCl (pH 7.5) at room temperature. All data were measured at an applied voltage of 0.1 V in 4 M CsCl solution buffered with 10 mM Tris-HCl (pH 7.5).

## SI-5. Effect of electrolyte concentration at DNA measurement

The electrolyte concentration at DNA measurement affects the DNA translocation speed across a  $\text{CaCl}_2$ -CBD nanopore. Figure S5 shows log-scaled histograms of dwell time for poly(dA)<sub>60</sub> in 1 M CsCl solution buffered with 10 mM Tris-HCl or 4 M CsCl solution buffered with 10 mM Tris-HCl. The most frequent dwell times are 2.1 ms (1 M CsCl) and 6.0 ms (4 M CsCl). Therefore, a 4-fold increase in the electrolyte concentration resulted in an approximately 3-fold deceleration of DNA speed. This feature is consistent with the previously reported result.<sup>5</sup> The use of a measurement solution with a high concentration enables not only deceleration of the DNA speed but also an increase in conductivity (1 M CsCl: 10.8 S/m, 4 M CsCl: 38.0 S/m) with an approximate 4-fold signal-to-noise ratio. Thereafter, a solution with a high concentration is preferred for DNA measurement using the  $\text{CaCl}_2$ -CBD nanopore. For the Debye length, we used a 1.0-nm-diameter nanopore in our experiments to investigate the slowing effect. This ultrasmall nanopore size is almost the same as the Debye length in our experiments (1 nm at 1 M CsCl solution and 0.5 nm at 4 M CsCl solution). Therefore, we considered that DNA could interact sufficiently with the adsorbed ions at the nanopore even under shorter Debye length conditions of 4 M CsCl solution.

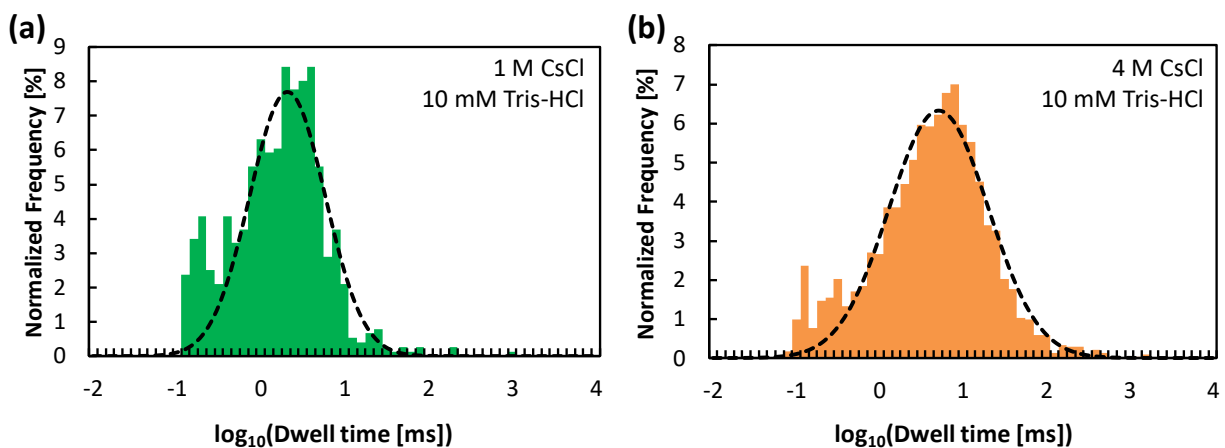

**Figure S5.** The log-scaled histograms of dwell time for poly(dA)<sub>60</sub> translocation using a different nanopore fabricated in 1 M CaCl<sub>2</sub> solution buffered with 10 mM Tris-HCl (pH 7.5) at room temperature. All data were measured at an applied voltage of 0.1 V in (a) 1 M CsCl solution buffered with 10 mM Tris-HCl buffer at pH 7.5 (N=1010) or (b) 4 M CsCl solution buffered with 10 mM Tris-HCl buffer at pH 7.5 (N=2331).

## SI-6. Temperature dependence of dwell time for other DNA translocations

We evaluated the temperature dependence of dwell time for other ssDNAs (poly(dA)<sub>60</sub>) using a CaCl<sub>2</sub>-CBD nanopore. It was observed that the dwell time similarly depends on temperature. The most frequent peaks were 6.0 ms (0.1 ms/base) at 25 °C, 63 ms (1.1 ms/base) at 4 °C, 250 ms (4.2 ms/base) at -8 °C and 710 ms (12 ms/base) at -16 °C. Figure S6 shows an Arrhenius plot for poly(dA)<sub>60</sub> translocation. These data were also well fitted ( $R^2 = 0.99$ ) by the Arrhenius law. We obtained an enthalpic barrier of 30 k<sub>B</sub>T, which is the same order of magnitude as that for the ssDNA described in the main text.

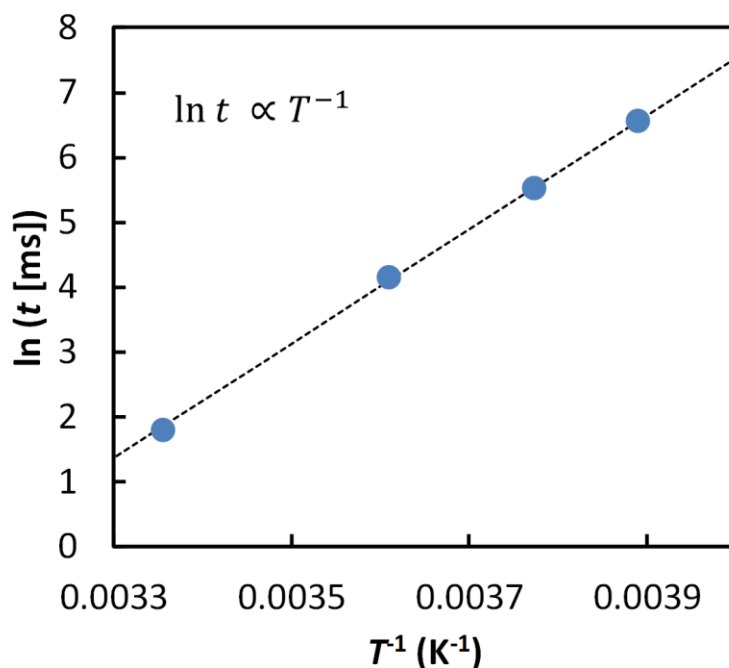

**Figure S6.** The Arrhenius plot for poly(dA)<sub>60</sub> translocation across a CaCl<sub>2</sub>-CBD nanopore at an applied voltage of 0.1 V. All data were measured at various temperatures in 4 M CsCl solution buffered with 10 mM Tris-HCl at pH 7.5.



## SI-7. Dependence of the slowing effect on nanopore diameter

We found an obvious dependence of the slowing effect on the diameter of nanopores. Figure S7 shows the scatter plot for poly(dA)<sub>60</sub> translocation time versus diameter of nanopores fabricated by CBD in 1 M CaCl<sub>2</sub> solution buffered with 10 mM Tris-HCl, 1 M CsCl solution buffered with 10 mM Tris-HCl, or 1 M HCl solution. There was a dramatic delaying effect with a boundary of 1.2 nm. DNA translocation was decelerated and tended to be almost constant when using a nanopore with a diameter smaller than 1.2 nm. However, the slowing effect could not be observed when using a nanopore with a diameter larger than 1.3 nm, even when a nanopore was created by CBD with CaCl<sub>2</sub>. This transition point indicated that the minimum diameter at which ssDNA can sufficiently interact with the Ca<sup>2+</sup>-adsorbed layer on the nanopore sidewall is 1.2 nm. This value matches the molecular diameter of ssDNA calculated from crystal analysis.<sup>6</sup> Therefore, a strong interaction between DNA and the sidewall of the nanopore begins to appear when the diameter of a nanopore is smaller than that of ssDNA. On the other hand, the DNA translocation time using a CsCl-CBD nanopore or a HCl-CBD nanopore was still short even when the diameter of the nanopore was smaller than 1.2 nm. This difference is additional evidence for the slowing effect of a CaCl<sub>2</sub>-CBD nanopore.

We also evaluated the temperature dependence of poly(dA)<sub>60</sub> translocation time using CaCl<sub>2</sub>-CBD nanopores with diameters of 1.0 nm or 1.6 nm. Figure S8 shows Arrhenius plots for both nanopores. We observed a clear temperature dependence of the DNA translocation time for the 1.0-nm diameter nanopore, while only a slight temperature dependence of the DNA translocation time was observed for the 1.6-nm diameter nanopore. The results also support that the origin of the slowing effect is the interaction between DNA and the divalent cations on the sidewall of the nanopore.

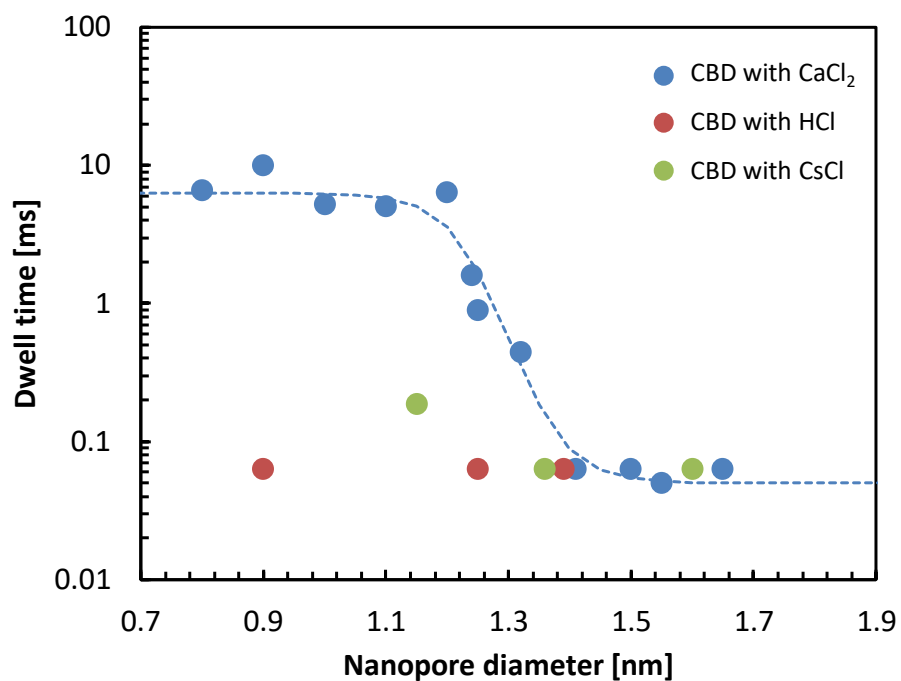

**Figure S7.** The scatter plot of nanopore diameter versus dwell time of ssDNA translocation across a nanopore fabricated with 1 M CaCl<sub>2</sub> solution buffered with 10 mM Tris-HCl at pH 7.5 (blue), 1 M CsCl solution buffered with 10 mM Tris-HCl at pH 7.5 (green) and 1 M HCl solution (red). All data were measured at an applied voltage of 0.1 V in 4 M CsCl solution buffered with 10 mM Tris-HCl at pH 7.5 (at room temperature). The dashed line is the fitted curve of a sigmoid function.

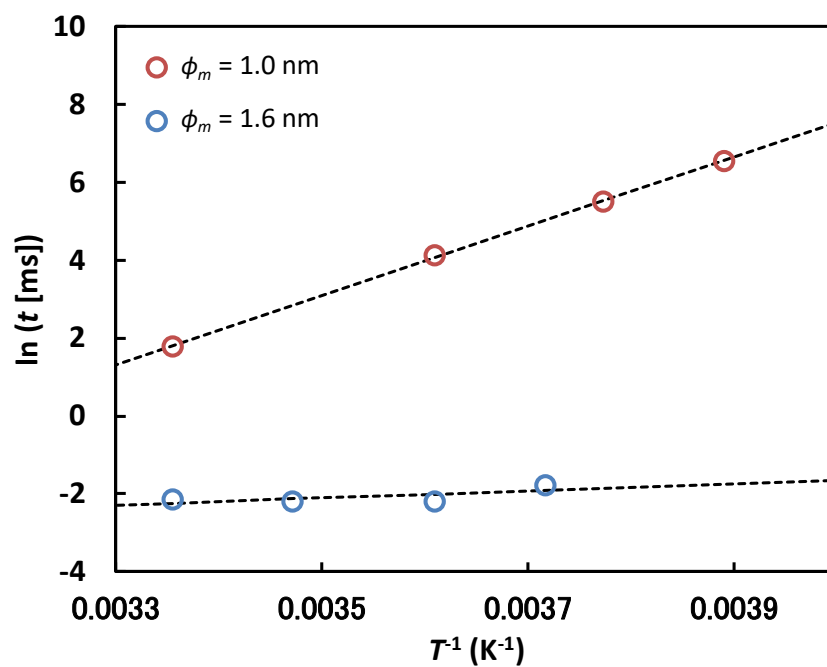

**Figure S8.** The Arrhenius plot for the poly(dA)<sub>60</sub> translocation experiment using (a) a 1.0-nm-diameter nanopore and (b) a 1.6-nm-diameter nanopore fabricated in 1 M CaCl<sub>2</sub> solution buffered with 10 mM Tris-HCl at pH 7.5. All data were measured at an applied voltage of 0.1 V in 4 M CsCl solution buffered with 10 mM Tris-HCl at pH 7.5.

### SI-8. Voltage dependence of dwell time and translocation frequency

Figure S9 presents the voltage dependence of the DNA duration time,  $t$ , and DNA translocation frequency,  $f$ , for poly(dA)<sub>60</sub> translocation using a CaCl<sub>2</sub>-CBD nanopore. Previous works have reported that the voltage dependence of ssDNA translocation time decreases exponentially<sup>7</sup> and that the voltage dependence of ssDNA translocation frequency increases linearly.<sup>8</sup> We confirmed that our CaCl<sub>2</sub>-CBD nanopore behaves similarly to a conventional SiN nanopore.

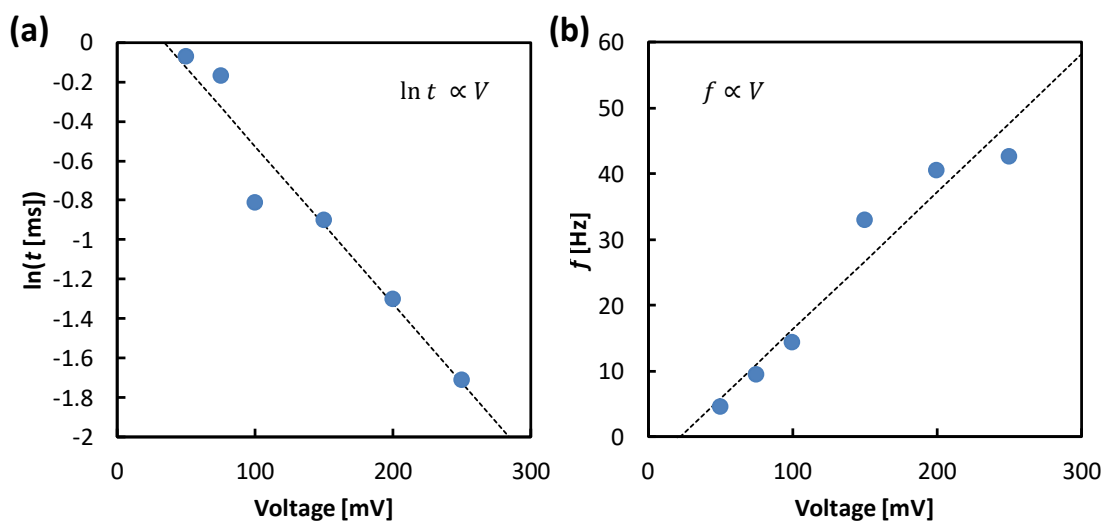

**Figure S9.** The voltage dependence of the dwell time and frequency of ssDNA translocation. dA<sub>60</sub> translocation was measured using a 1.3-nm-diameter nanopore fabricated with 1 M CaCl<sub>2</sub> solution buffered with 10 mM Tris-HCl at pH 7.5. All data were measured at room temperature in 4 M CsCl solution buffered with 10 mM at pH 7.5.

### SI-9. Typical current trace for dNMP measurement

Figure S10 shows typical current traces for dNMP translocation across  $\text{CaCl}_2$ -CBD nanopores. Stable measurement of dNMP translocation can be performed.

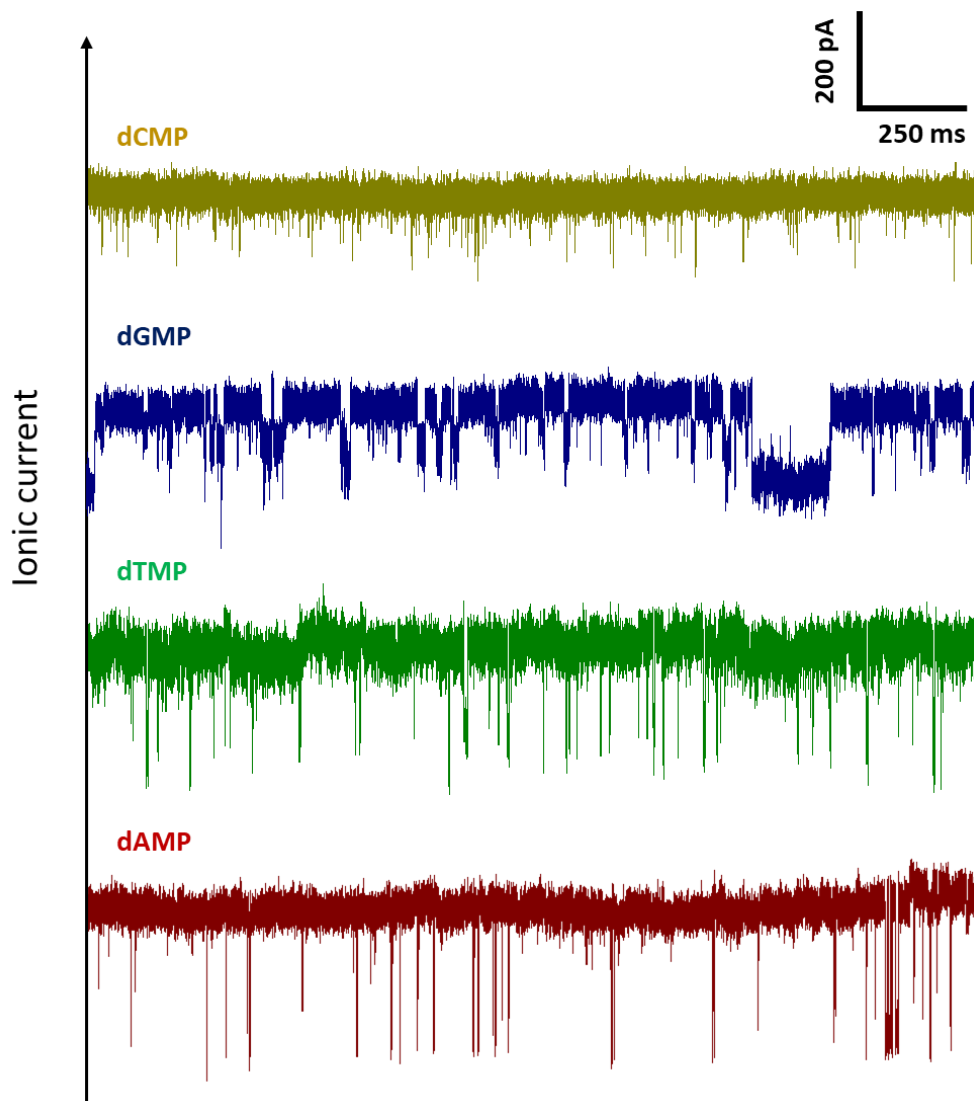

**Figure S10.** Typical current traces for dNMP translocation across the same single  $\text{CaCl}_2$ -CBD nanopore with a diameter of 1.0 nm. The solution was washed using 4 M CsCl solution buffered with 10 mM Tris-HCl at pH 7.5 after every dNMP measurement. All data were measured at an applied voltage of 0.1 V in 4 M CsCl solution buffered with 10 mM Tris-HCl at pH 7.5 (at room temperature).

### **SI-10. Estimation of $h_{eff}$ of 5-nm-thick nanopore fabricated by CBD**

We previously reported that an effective thickness ( $h_{eff}$ ) of CBD nanopores is approximately one-third of the actual membrane thickness, similar to TEM-drilled nanopores.<sup>9,10</sup> Additionally, in our other previous report,<sup>11</sup> we confirmed the I-V characteristics of the 5-nm-thick nanopore fabricated via CBD. The measured values were well matched with the predicted line derived from Equation 1 using  $h_{eff} = 1.7$  nm,  $\phi_m = 2.8$  nm (TEM-observed value). Therefore, although the shape of the CBD-made nanopore (a conical shape)<sup>12</sup> is different from that of the TEM-drilled nanopore (a hourglass shape)<sup>3</sup>, we considered that the effective thickness of the 5-nm-thick CBD nanopore could be estimated to be 1.7 nm.

### SI-11. I-V curves for CBD nanopores using various ions

Figure S11 shows the I-V curves for the three CBD nanopores using various ions shown in Figure 2. Figure S11 indicates that the three different nanopores have almost the same I-V characteristics in 4 M CsCl 10 mM Tris-HCl solution. This result indicates that the three different nanopores have similar sizes.

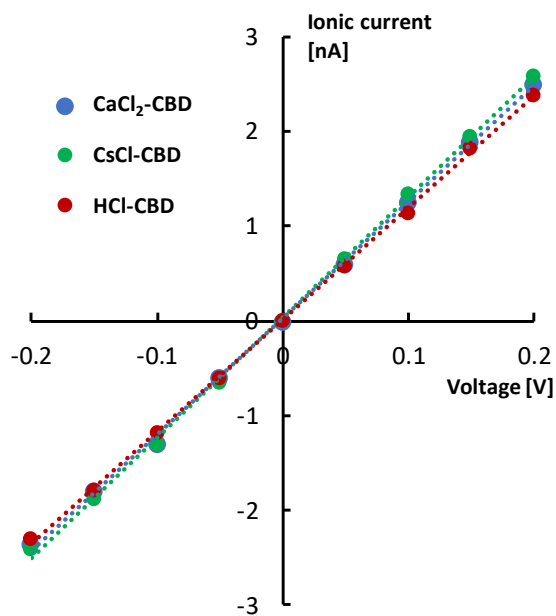

**Figure S11.** The I-V curves for the CaCl<sub>2</sub>-CBD nanopore, CsCl-CBD nanopore and HCl-CBD nanopore are shown in Figure 2. All data were measured in 4 M CsCl solution buffered with 10 mM Tris-HCl at pH 7.5 (at room temperature).

## SI-12. Ion selectivity measurements of CBD-nanopores

The adsorption of divalent ions to the nanopore wall is expected to lead to better ionic selectivity. Therefore, to estimate the  $\text{Cs}^+/\text{Cl}^-$  selectivity ratio of CBD nanopores, we performed reversal voltage measurements as described in the literature.<sup>13</sup> The reversal voltage  $V_{\text{rev}}$  is defined as the applied voltage at which the net current is zero. The ionic selectivity ratio was estimated for each pore by fitting the reversal voltages to the Goldman-Hodgkin-Katz (GHK) equation,

$$V_{\text{rev}} = \frac{k_{\text{B}}T}{e} \ln \left( \frac{S_{\text{GHK}}c_{\text{high}} + c_{\text{low}}}{S_{\text{GHK}}c_{\text{low}} + c_{\text{high}}} \right)$$

where  $S_{\text{GHK}}$  is the  $\text{Cs}^+/\text{Cl}^-$  selectivity ratio,  $c_{\text{high}}$  and  $c_{\text{low}}$  are the solution concentrations in the chambers,  $e$  is the electron charge,  $k_{\text{B}}$  is the Boltzmann constant, and  $T$  is the solution temperature. Since  $\text{Cs}^+$  and  $\text{Cl}^-$  ions have similar mobilities ( $\text{Cs}^+$ :  $8.01 \times 10^{-4} \text{ cm}^2 \text{ s}^{-1} \text{ V}^{-1}$ ,  $\text{Cl}^-$ :  $7.92 \times 10^{-4} \text{ cm}^2 \text{ s}^{-1} \text{ V}^{-1}$ )<sup>13</sup>, the liquid junction potentials (approximately  $< 1 \text{ mV}$ ) were negligible for these measurements.

Figure S12 shows the obtained reversal voltages for each pore. The results indicate that the  $\text{Cs}^+/\text{Cl}^-$  selectivity ratios of the  $\text{CaCl}_2$ -CBD nanopore and  $\text{CsCl}$ -CBD nanopore were estimated to be  $3.0 \times 10^2$  and  $6.5 \times 10^1$ , respectively. This means that  $\text{CaCl}_2$ -CBD nanopores have better ionic selectivity than  $\text{CsCl}$ -CBD nanopores, which implies the adsorption of  $\text{Ca}^{2+}$  ions to the nanopore wall.



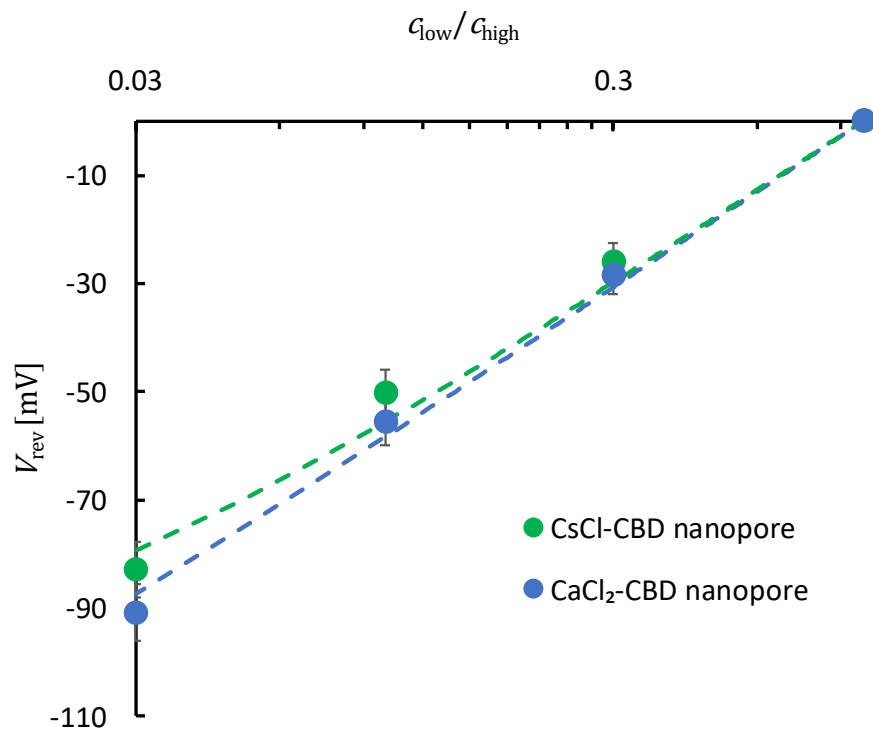

**Figure S12.** Reversal voltages ( $N=3$ ) as a function of the concentration ratio  $c_{\text{low}}/c_{\text{high}}$ , along with fit to the GHK equation (dotted lines).  $c_{\text{high}}= 1$  M CsCl solution,  $c_{\text{low}}=0.03$  M, 0.1 M, 0.3 M, 1 M CsCl solution. The diameter of each pore was 1.0 nm.

## References

- 1 I. Yanagi, T. Ishida, K. Fujisaki and K.-I. Takeda, *Sci. Rep.*, 2015, **5**, 14656.
- 2 R. Akahori, T. Haga, T. Hatano, I. Yanagi, T. Ohura, H. Hamamura, T. Iwasaki, T. Yokoi and T. Anazawa, *Nanotechnology*, 2014, **25**, 275501.
- 3 K. Venta, G. Shemer, M. Puster, J. A. Rodríguez-Manzo, A. Balan, J. K. Rosenstein, K. Shepard and M. Drndić, *ACS Nano*, 2013, **7**, 4629–4636.
- 4 Y. Goto, I. Yanagi, K. Matsui, T. Yokoi and K.-I. Takeda, *Sci. Rep.*, 2016, **6**, 31324.
- 5 S. W. Kowalczyk, D. B. Wells, A. Aksimentiev and C. Dekker, *Nano Lett.*, 2012, **12**, 1038–1044.
- 6 W. Saenger, *Principles of Nucleic Acid Structure*, Springer, New York, 1984.
- 7 S. W. Kowalczyk, M. W. Tuijtel, S. P. Donkers and C. Dekker, *Nano Lett.*, 2010, **10**, 1414–1420.
- 8 D. V. Verschueren, M. P. Jonsson and C. Dekker, *Nanotechnology*, 2015, **26**, 234004.
- 9 I. Yanagi, R. Akahori, T. Hatano and K. Takeda, *Sci. Rep.*, 2014, **4**, 5000 (2014).
- 10 M. Wanunu, T. Dadoosh, V. Ray, J. Jin, L. McReynolds and M. Drndić, *Nat. Nanotechnol.*, **5**, 807-814 (2010).
- 11 Y. Goto, I. Yanagi, K. Matsui, T. Yokoi and K. Takeda, *Nanoscale*, **10**, 20844-20850 (2018).
- 12 C. Ying, Y. Zhang, Y. Feng, D. Zhou, D. Wang, Y. Xiang, W. Zhou, Y. Chen, C. Du and J. Tian, *Appl. Phys. Lett.*, **109**, 063015 (2016).
- 13 R. C. Rollings, A. T. Kuan and J. A. Golovchenko, *Nat. Commun.* **7**, 11408 (2016).
